# Supplementary material
Source: publisher figshare collection journal article supplement (https://acs.figshare.com/ndownloader/files/25854873)
Supplement: Supplementary file 1 [file 25854873]

## **Supporting Information**

### **High-Throughput Screening to Identify Chemical Cardiotoxic Potential**

Shagun Krishna<sup>1</sup>, Brian Berridge<sup>1</sup> and Nicole Kleinstreuer<sup>1\*</sup>

<sup>1</sup>Division of the National Toxicology Program, National Institute of Environmental Health Sciences

\*Corresponding Author: [nicole.kleinstreuer@nih.gov](mailto:nicole.kleinstreuer@nih.gov)

Nicole Kleinstreuer, Ph.D.

Tel 984-287-3150

[nicole.kleinstreuer@nih.gov](mailto:nicole.kleinstreuer@nih.gov)

530 Davis Drive

Keystone Building

Durham, NC 27713, USA

\*Author for correspondence:

## TABLE OF CONTENTS

### Supplementary File 1:

**Figure S1.** Vectors on the PCA plot indicate the relative influence of each slice on the plot of PC1 vs PC2.

**Figure S2.** (A) Optimum number of clusters as obtained by Elbow method. (B) Overview of the cluster structure obtained by hierarchical clustering of the compounds.

**Figure S3.** Structure based SOM on 1095 chemicals obtained from CardioToxPi analysis, color represents the chemical count by cluster (scale on left). 100 clusters are included in total.

**Figure S4.** Principal component analysis of the 1111 chemicals obtained from CardioToxPi results, using the set of selected structural descriptors. The first component explains 26.03 % of the descriptor variability and the second 14.95 %. Chemicals are colored based on their activity in green for inactive chemicals, while red for active.

**Figure S5:** Drugs and environmental chemicals with reference literature data for positive and negative cardiotoxic effects, mapped to the CardioToxPi dataset. The number on the outer edges shows the individual CardioToxPi scores of the chemicals.

### Supplementary File 2 (xlsx):

**Table S1:** 9215 Chemical and 434 assay pair

**Table S2:** Input for generation of CardioToxPi 1138 Chemical-314 assay pair

**Table S3:** Mapping of assays to the six CV failure modes

**Table S4:** CardioToxPi results with score

**Table S5:** Cluster Description

**Table S6:** List of 1D-2D descriptors

**Table S7:** Reference chemical information

**Table S8:** Mapping of Reference chemicals with CardioToxPi chemicals

**Table S9:** Mapping of Cardiomyocyte data with CardioToxPi chemicals

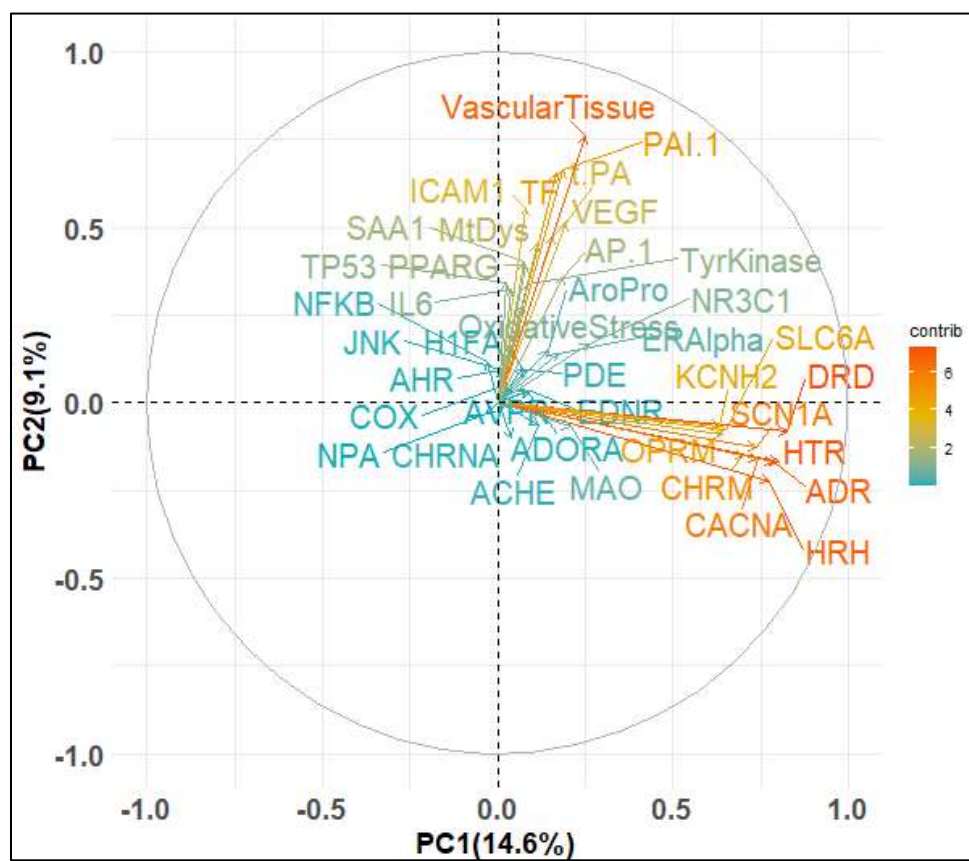

**Figure S1.** Vectors on the PCA plot indicate the relative influence of each slice on the plot of PC1 vs PC2.

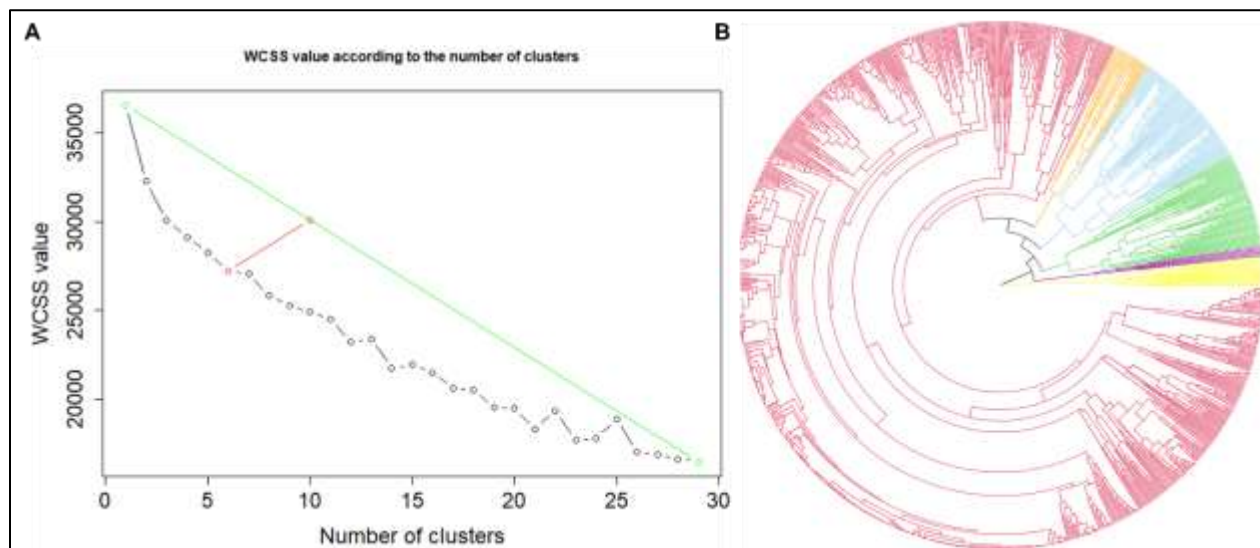

**Figure S2.** (A) Optimum number of clusters as obtained by Elbow method. (B) Overview of the cluster structure obtained by hierarchical clustering of the compounds.

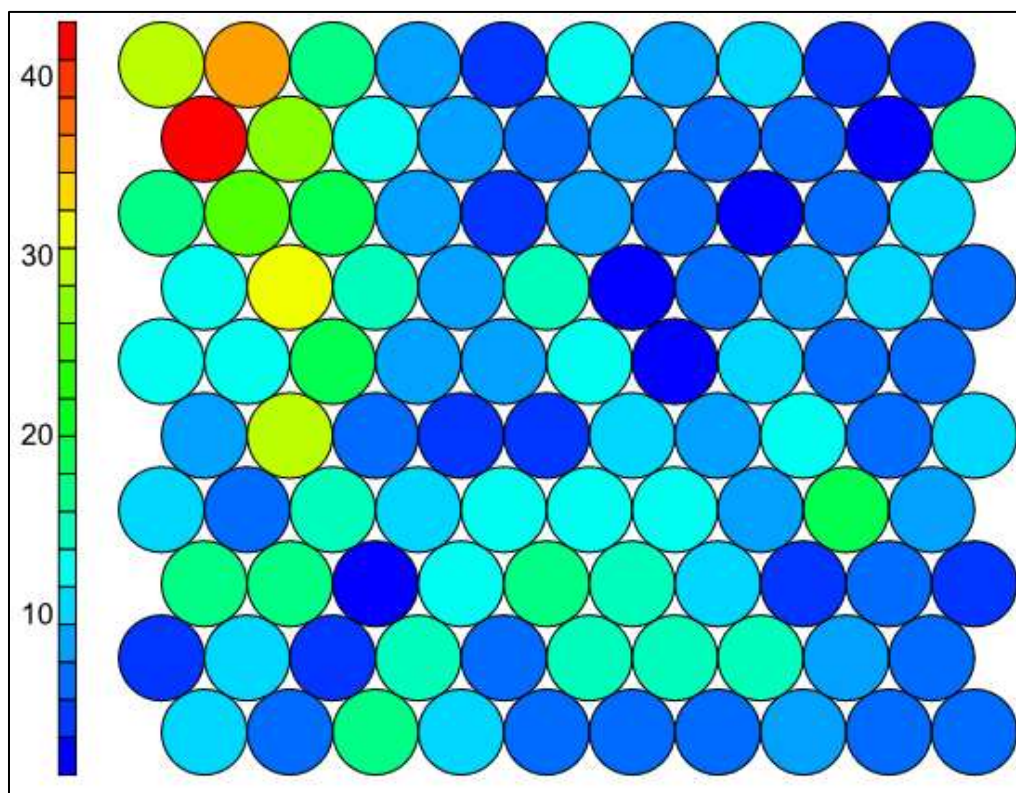

**Figure S3.** Structure based SOM on 1095 chemicals obtained from CardioToxPi analysis, color represents the chemical count by cluster (scale on left). 100 clusters are included in total.

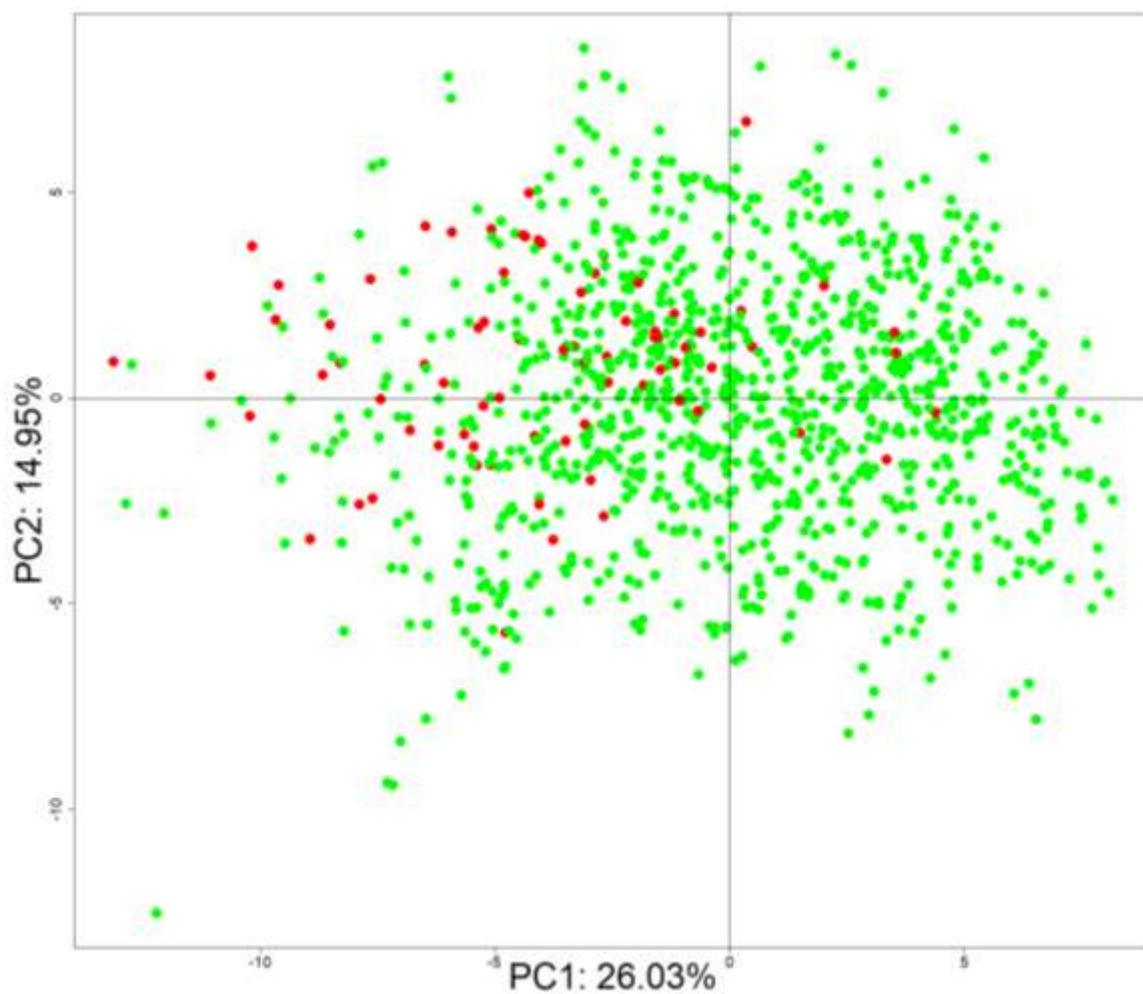

**Figure S4.** Principal component analysis of the 1111 chemicals obtained from CardioToxPi results, using the set of selected structural descriptors. The first component explains 26.03 % of the descriptor variability and the second 14.95 %. Chemicals are colored based on their activity in green for inactive chemicals, while red for active.
